# Supplementary material
Source: publisher figshare collection journal article supplement (https://sage.figshare.com/ndownloader/files/23063285)
Supplement: Supplementary file 1 [file 23063285]

n	orig_year	orig_math_state	dest_math_state	mn_female	mn_eds_g8
250299	2009	Grade	Grade	0.49694964	0.5390473
3016	2009	Grade	Alg I	0.43600795	0.2092175
7329	2009		Grade	0.49283668	0.48014736
185156	2010	Grade	Grade	0.48965198	0.60070968
72472	2010	Grade	Alg I	0.51517826	0.37555194
3097	2010	Alg I	Geom	0.43493703	0.20536003
41285	2010		Grade	0.48702919	0.66595614
7560	2010		Alg I	0.51732802	0.41018519
214810	2011	Grade	Alg I	0.49066618	0.60366368
4763	2011	Grade	Math Models	0.48939744	0.82490027
73309	2011	Alg I	Geom	0.51872212	0.36704907
4439	2011	Alg I	Alg I	0.47826087	0.56003606
1814	2011	Alg I	Alg II	0.48787209	0.35997796
3230	2011	Geom	Alg II	0.43560371	0.20340557
1745	2012	Grade	Alg I	0.3765043	0.79369628
187341	2012	Alg I	Geom	0.49534807	0.59047937
10051	2012	Alg I	Alg II	0.51557058	0.58531487
8879	2012	Alg I	No Mathematics	0.4798964	0.65063632
6543	2012	Alg I	Alg I	0.36435884	0.7417087
3244	2012	Alg I	Math Models	0.43865597	0.74414301
2717	2012	Alg I	Drop-out	0.44976076	0.82186234
3864	2012	Math Models	Geom	0.49430642	0.82815737
70485	2012	Geom	Alg II	0.51901823	0.36409166
1388	2012	Geom	No Mathematics	0.53025937	0.35806915
1130	2012	Geom	Geom	0.44159293	0.71061945
3303	2012	Alg II	Pre-Calc	0.43929762	0.23614895
1119	2012	Alg II	Geom	0.5165326	0.38337803
4693	2013	Alg I	Geom	0.37183037	0.72384405
1705	2013	Alg I	No Mathematics	0.39061582	0.77653956
2283	2013	Math Models	Geom	0.44108629	0.72010511
1010	2013	Math Models	Alg II	0.52574259	0.60000002
143392	2013	Geom	Alg II	0.51277614	0.57621765
24480	2013	Geom	Math Models	0.43864378	0.60539216
10326	2013	Geom	No Mathematics	0.49331784	0.6538834
9876	2013	Geom	Geom	0.39317536	0.71952206
3338	2013	Geom	Drop-out	0.41941282	0.79628521
2313	2013	Geom	Pre-Calc	0.55339384	0.56506699
62660	2013	Alg II	Pre-Calc	0.52128953	0.36549634
5657	2013	Alg II	Geom	0.50468445	0.64822346
3172	2013	Alg II	Ind. Study	0.56841111	0.34709963
2928	2013	Alg II	No Mathematics	0.52288252	0.43408471
2579	2013	Alg II	AP Stats	0.50213259	0.24777046
1616	2013	Alg II	Alg II	0.42883664	0.64294553
1527	2013	Alg II	Other Mathematics	0.49901769	0.42763588
2081	2013	Pre-Calc	AP Calc AB	0.47477174	0.30225852
2624	2014	No Mathematics	No Mathematics	0.4824695	0.61928356
16568	2014	Math Models	Alg II	0.46601883	0.59041524
5828	2014	Math Models	No Mathematics	0.40133837	0.61324638
1005	2014	Math Models	Geom	0.34328359	0.72039801
7480	2014	Geom	Alg II	0.43649733	0.72005349
5222	2014	Geom	No Mathematics	0.41727307	0.70413637
2798	2014	Geom	Pre-Calc	0.51429594	0.67834169
2190	2014	Geom	Math Models	0.3520548	0.69041097
2165	2014	Geom	Geom	0.32886836	0.74318707
1548	2014	Geom	Drop-out	0.34948319	0.78746772
69072	2014	Alg II	Pre-Calc	0.52788395	0.5678857
23073	2014	Alg II	Ind. Study	0.53473759	0.50413907
21091	2014	Alg II	No Mathematics	0.49660993	0.64112657
18078	2014	Alg II	Other Mathematics	0.49706826	0.56322604
7249	2014	Alg II	Alg II	0.42198923	0.70533866
2961	2014	Alg II	AP Stats	0.59540695	0.41675109
2144	2014	Alg II	Drop-out	0.39832088	0.79151118
1878	2014	Alg II	Math Models	0.4052183	0.64589989
1569	2014	Alg II	Geom	0.39069471	0.76545572
1925	2014	Ind. Study	No Mathematics	0.59324676	0.41194806
1018	2014	Ind. Study	Pre-Calc	0.51964635	0.40078586
21885	2014	Pre-Calc	AP Calc AB	0.48832533	0.34864062
18687	2014	Pre-Calc	No Mathematics	0.5571788	0.45625302
8361	2014	Pre-Calc	AP Stats	0.58330345	0.29374477
7004	2014	Pre-Calc	Ind. Study	0.55682468	0.3172473
4524	2014	Pre-Calc	AP Calc BC	0.41180372	0.19076039
2719	2014	Pre-Calc	Other Mathematics	0.51452738	0.44244206
1781	2014	Pre-Calc	Pre-Calc	0.46209994	0.60752386
1171	2014	AP Stats	AP Calc AB	0.49103332	0.25533733
1274	2014	AP Calc AB	AP Calc BC	0.4309262	0.31083202
